# Supplementary material for: Biomechanics Analysis of the Firefighters’ Thorax Movement on Personal Protective Equipment during Lifting Task Using Inertial Measurement Unit Motion Capture
Source: MDPI journal article supplement (doi:10.3390/ijerph192114232), 2022-10-31
Supplement: s1 [file s1]

## File S1: SELF ASSESSMENT MUSCULOSKELETAL PAIN / DISCOMFORT SURVEY FORM (Refer to Part 2.1)

### Instruction:

1. Tick (✓) on any body parts (Column A) if you feel discomfort/pain during your work in the last 12 months
2. For those body parts you were feeling pain/discomfort, tick (✓) (Column B) if in your opinion, the pain is due to your work.

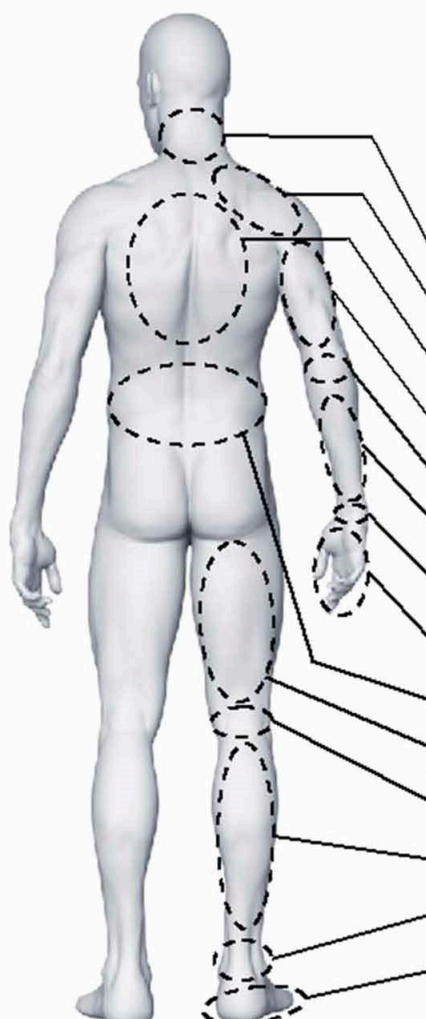

| Body Parts | A                                                          |   | B                                                   |   |
|------------|------------------------------------------------------------|---|-----------------------------------------------------|---|
|            | I have pain/<br>discomfort in the<br>following body parts. |   | I think the pain/<br>discomfort comes<br>from work. |   |
| Neck       |                                                            |   |                                                     |   |
| Shoulder   |                                                            |   |                                                     |   |
| Upper back |                                                            |   |                                                     |   |
| Upper arm  | L                                                          | R | L                                                   | R |
| Elbow      | L                                                          | R | L                                                   | R |
| Lower arm  | L                                                          | R | L                                                   | R |
| Wrist      | L                                                          | R | L                                                   | R |
| Hand       | L                                                          | R | L                                                   | R |
| Lower back |                                                            |   |                                                     |   |
| Thigh      | L                                                          | R | L                                                   | R |
| Knee       | L                                                          | R | L                                                   | R |
| Calf       | L                                                          | R | L                                                   | R |
| Ankle      | L                                                          | R | L                                                   | R |
| Feet       | L                                                          | R | L                                                   | R |

Name: \_\_\_\_\_ Staff ID No.: \_\_\_\_\_

Department: \_\_\_\_\_ Job tasks: \_\_\_\_\_

Contact No.: \_\_\_\_\_ Email: \_\_\_\_\_

Date: \_\_\_\_\_

*(Do not write anything in the below section. To be filled by trained person only)*

Is/Are the symptom(s) work related? Yes ☐ No ☐

Comments: \_\_\_\_\_

\_\_\_\_\_

Name: \_\_\_\_\_ Signature and stamp: \_\_\_\_\_

Date: \_\_\_\_\_
